# Supplementary material for: Metabolic Flux Analysis of Catechin Biosynthesis Pathways Using Nanosensor
Source: PubMed Central journal article supplement (PMC7222200; doi:10.3390/antiox9040288), 2020-03-31
Supplement: antioxidants-09-00288-s001.pdf [file antioxidants-09-00288-s001.pdf]

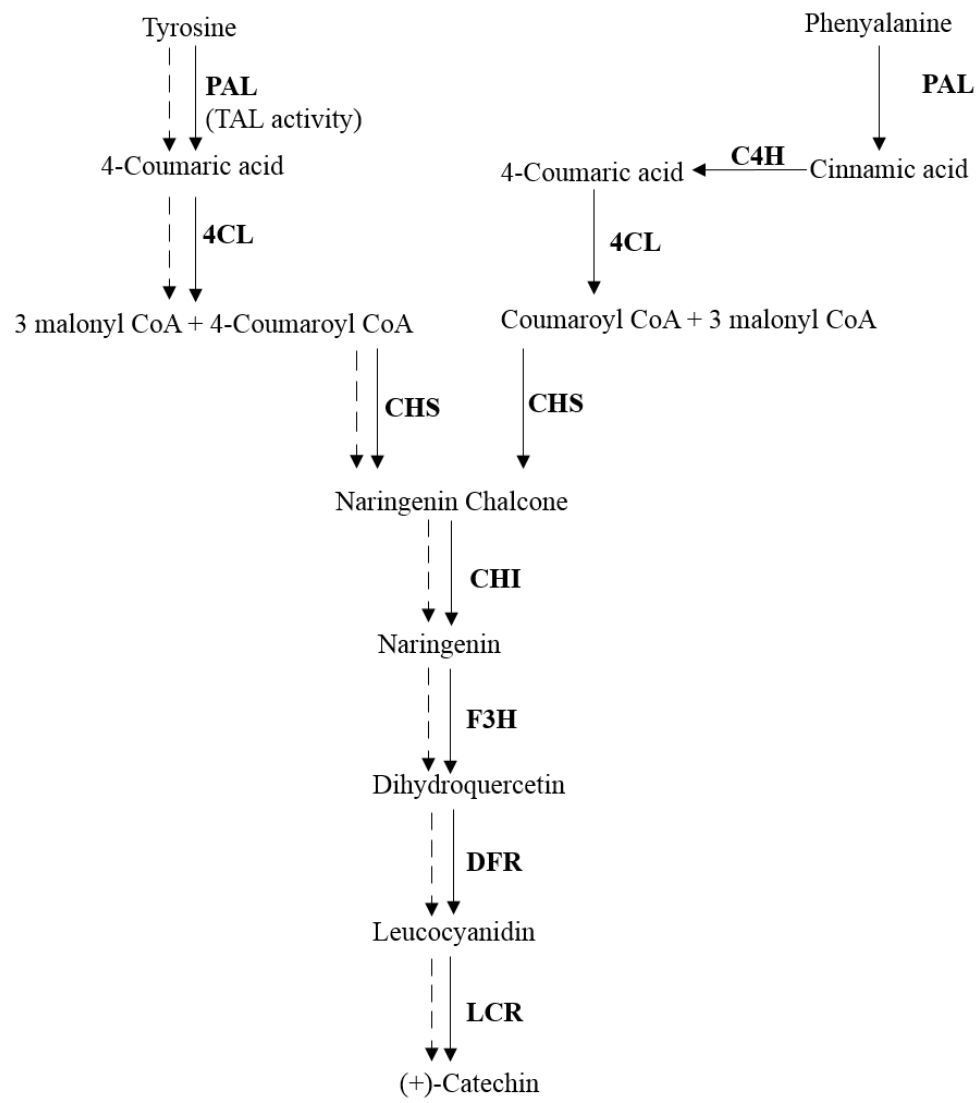

Fig. S1. (+)-Catechin biosynthetic pathway in plants adopted from Hwang et al. (2003) and Park et al. (2004). Dashed arrows represent the engineered catechin pathway in *E. Coli*. PAL : Phenyl - ammonia lyase ; C4H : Cinnamate 4 hydroxylase ; 4CL : 4 Coumarate CoA ligase ; CHS : Chalcone synthase ; CHI : Chalcone isomerase; F3H : Flavanone 3 hydroxylase ; DFR : Dihydroflavonol reductase ; LCR : Leucoanthocyanidin reductase; TAL : Tyrosine-ammonia lyase.

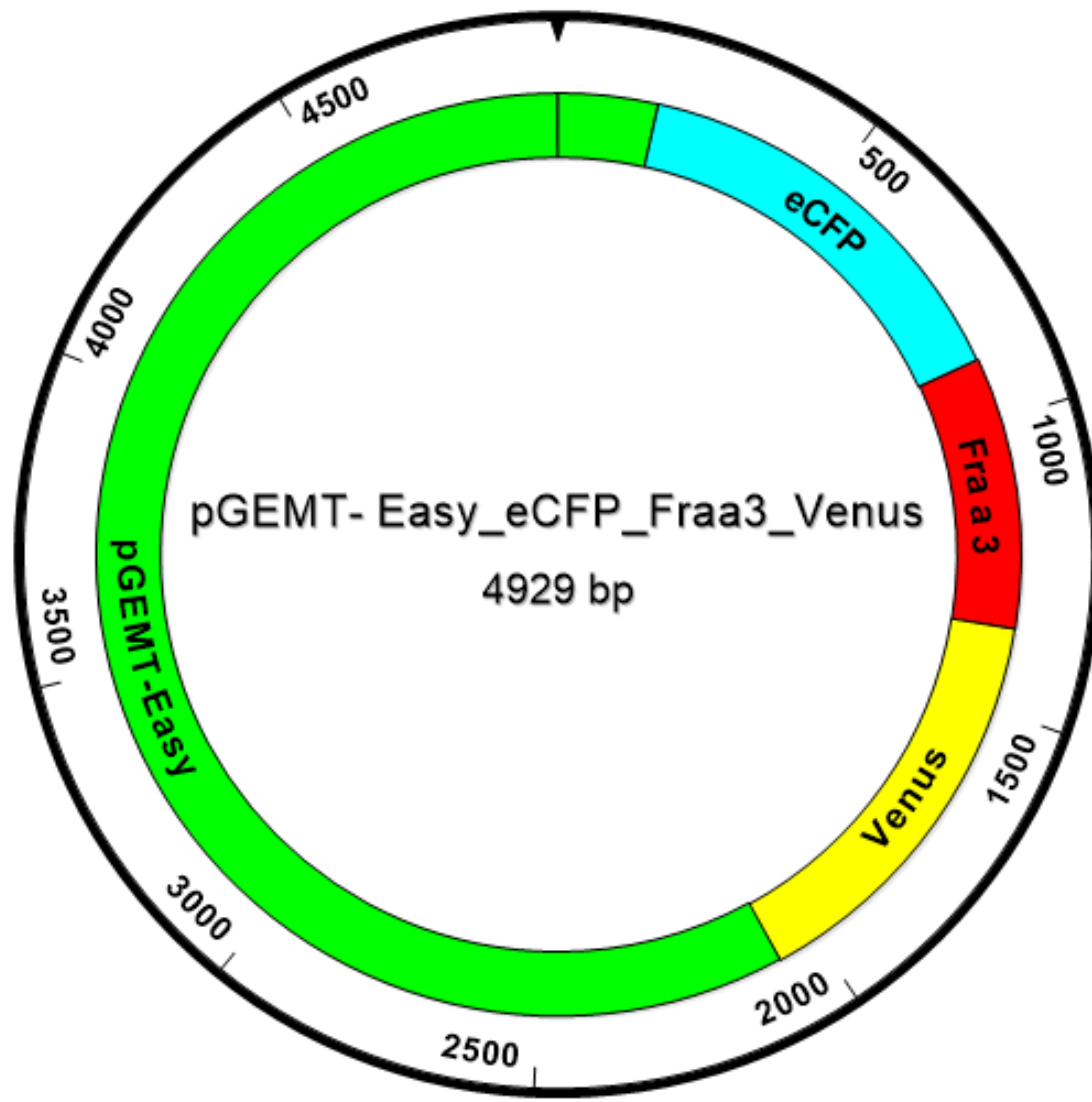

Fig. S2. Schematic representation of pGEMT-Easy\_eCFP\_Fra a 3\_Venus

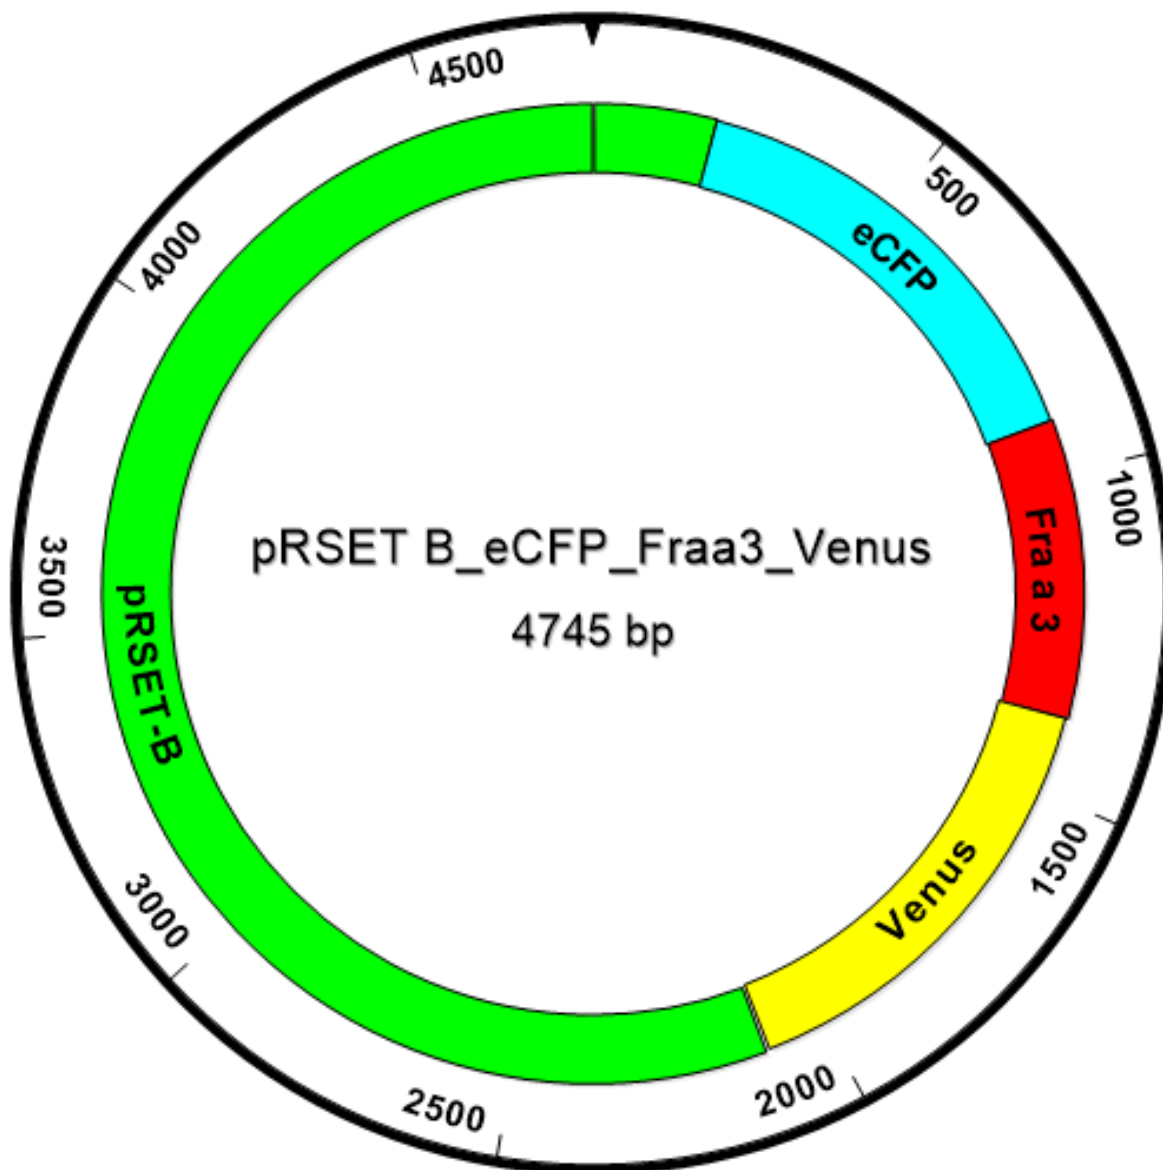

Fig. S3. Schematic representation of pRSETB\_eCFP\_Fra a 3\_Venus

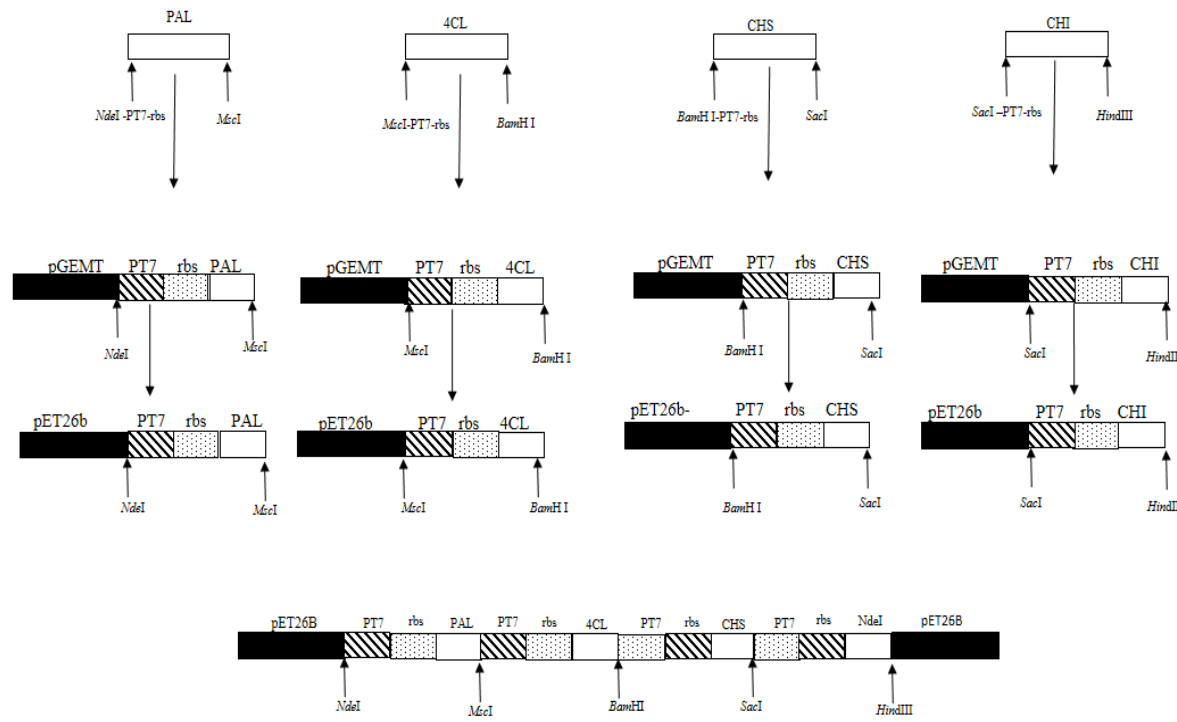

Fig. S4. Schematic depiction of the construct pET26b-PT7-rbs-PAL-PT7-rbs-4CL-PT7-rbs-CHS-PT7-rbs-CHI. Utilising DNA manipulation techniques, PAL, 4CL, CHS and CHI are placed separately under the control of T7 promoter and ribosome binding site in pET26b vector. PAL: Phenyl – ammonia lyase , 4CL : 4 Coumarate CoA ligase, CHS : Chalcone synthase, CHI : Chalcone isomerase, PT7 : Promoter T7, rbs : Ribosome binding site.

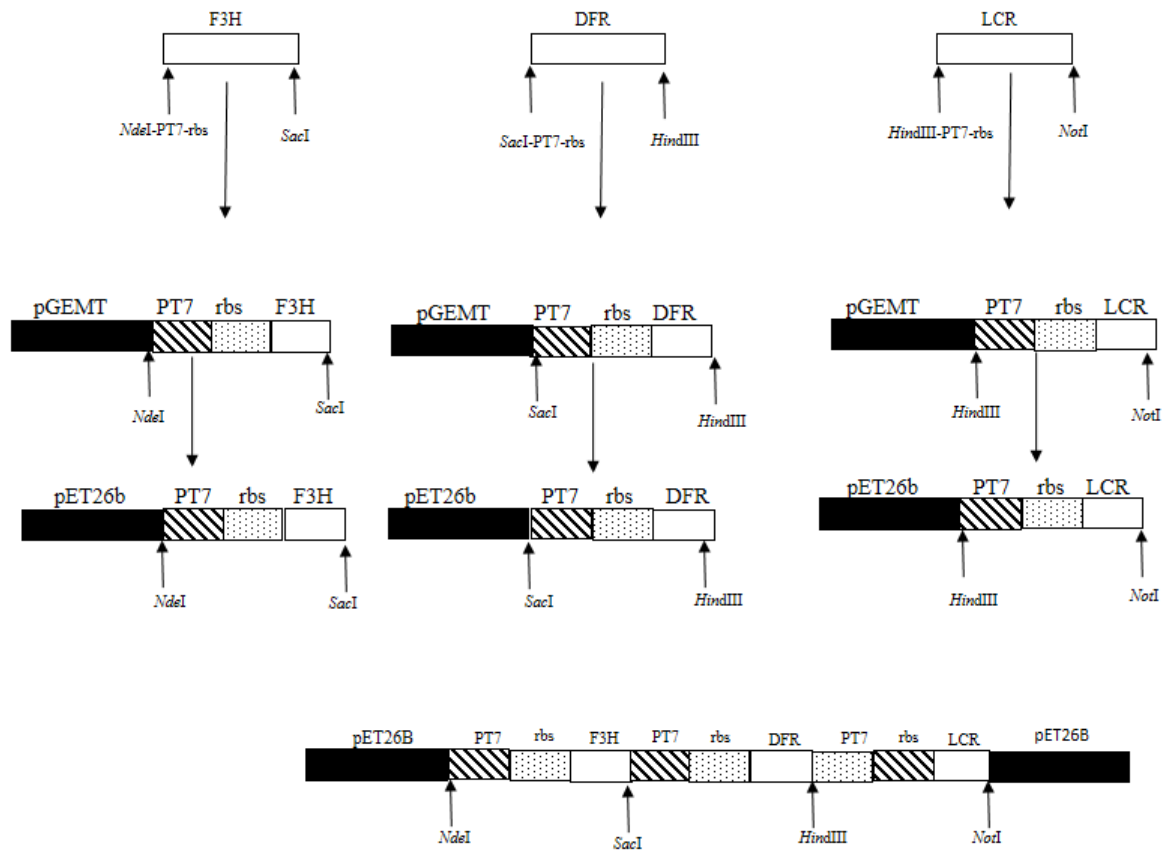

Fig. S5. Schematic representation of the construct pET26b-PT7-rbs-F3H-PT7-rbs-DFR-PT7-rbs-LCR. Employing the earlier DNA manipulation technique, F3H, DFR and LCR are placed separately under the control of T7 promoter and ribosome binding site in pET26 b vector. F3H : Flavanone 3 hydroxylase ; DFR : Dihydroflavolo reductase ; LCR : Leucoanthocyanidin reductase ; PT7 : Promoter T7 ; rbs : Ribosome binding site.

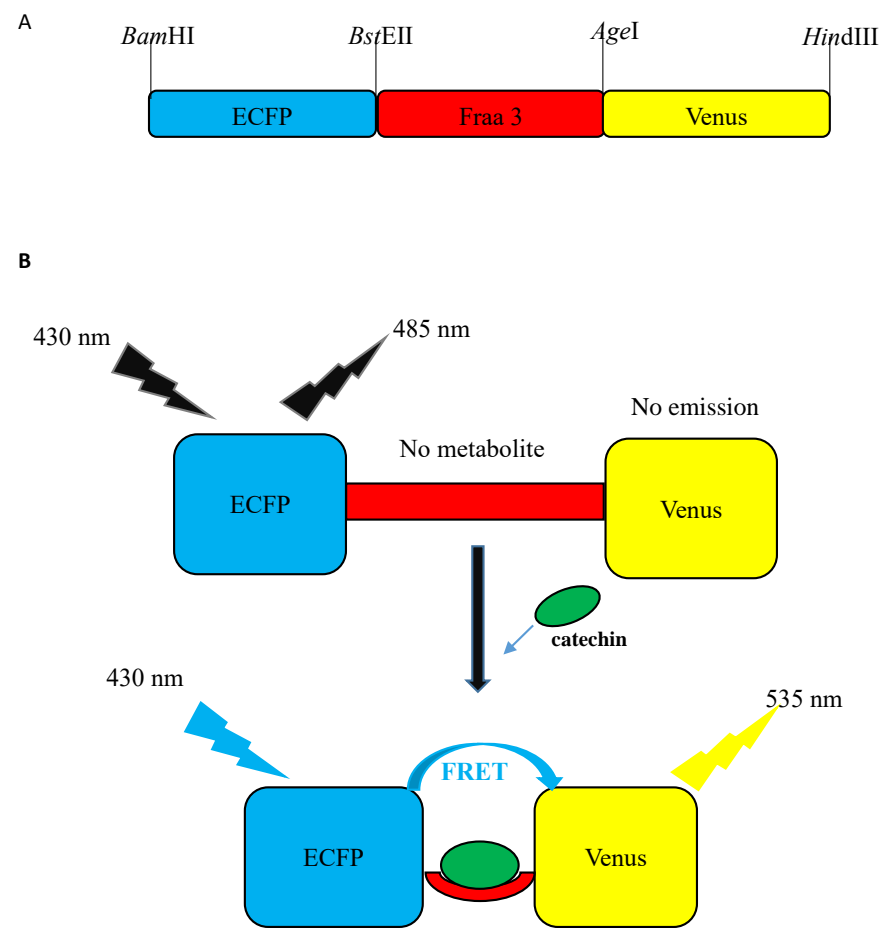

Figure S6. Designing of nanosensor. A. Schematic representation of positions of ECFP, Fraa3, Venus and various restriction endonuclease sites. B. Schematic representation of working of nanosensor. In the absence of (+)-catechin, no conformation in the fraa 3 occurred. Therefore, emission intensity of ECFP could not excite the Venus because of distance <10 nm. By the addition of (+)-catechin, There was conformational change in the fraa 3 that brought ECFP and Venus together at a distance >10 nm. Therefore, emission intensity of the ECFP successfully excites the Venus and causes the FRET.

**Nucleotide sequence of Fra a 3**

TTCACATACGAATCCGAGTTCACCTCAGTCATCCCACCACCTAAGTTGTTCAAGGCTTTCGTCCTTGACGCCGACAACCTCATCCCCAAGA  
TTGCCCCTCAGGCTGTGAAGAGTGCTGAAATCATTGAAGGAGATGGAGGTGTTGGAACCATCAAGAAGATCCATCTTGGTGAAGGAAGT  
GAATACAGCTACGTGAAGCATAAGATTGATGGAATCGACAAAGACAACCTTCGTGTACAGCTACAGTATCATCGAGGGAGATGCTATCGG  
AGACAAGATTGAGAAGATTCCTATGAGATTAAGTTGGTAGCATCCGGTGGAGGTTCCATCATCAAGAGCACCAGTCACTACCACACCA  
AGGGTGAGGTTCGAGATTAAGGAAGAGCATGTTAAGGCCGAAAGGAAAGAGCCGCTGGTCTGTTCAAGATCATTGAGAACCACCTCTTG  
GCCATCCTGAGGAATACAAC

**Nucleotide sequence of eCFP**

ATGGTGAGCAAGGGCGAGGAGCTGTTACCCGGGGTGGTGCCCATCCTGGTTCGAGCTGGACGGCGACGTAAACGGCCACAAGTTCAGCGT  
GTCCGGCGAGGGCGAGGGCGATGCCACCTACGGCAAGCTGACCCTGAAGTTCATCTGCACCACCGGCAAGCTGCCCGTGCCCTGGCCCA  
CCCTCGTGACCACCTGACCTGGGGCGTGCAAGTTCAGCCGCTACCCCGACCACATGAAGCAGCAGGACTTCTTCAAGTCCGCCATGC  
CCGAAGGCTACGTCCAGGAGCGCACCATCTTCTTCAAGGACGACGGCAACTACAAGACCCGCGCCGAGGTGAAGTTCGAGGGCGACAC  
CCTGGTGAACCGCATCGAGCTGAAGGGCATCGACTTCAAGGAGGACGGCAACATCCTGGGGCACAAGCTGGAGTACAACACTACATCAGC  
CACAACGTCTATATCACCGCCGACAAGCAGAAGAACGGCATCAAGGCCAACTTCAAGATCCGCCACAACATCGAGGACGGCAGCGTGC  
AGCTCGCCGACCA  
CTACCAGCAGAACACCCCCATCGGGCAGCGCCCCGTGCTGCTGCCCCGACAACCACTACCTGAGCACCCAGTCCGCCCTGAGCAAAGACC  
CCAACGAGAAGCGCGATCACATGGTCCTGCTGGAGTTCGTGACCGCCGCGGGATCACTCTCGGCATGGACGAGCTGTACAAG

**Nucleotide sequence of Venus**

ATGGTGAGCAAGGGCGAGGAGCTGTTACCCGGGGTGGTGCCCATCCTGGTTCGAGCTGGACGGCGACGTAAACGGCCACAAGTTCAGCGT  
GTCCGGCGAGGGCGAGGGCGATGCCACCTACGGCAAGCTGACCCTGAAGTTCATCTGCACCACCGGCAAGCTGCCCGTGCCCTGGCCCA  
CCCTCGTGACCACCTCGGCTACGGCCTCAGTGCTTCGCCCCGCTACCCCGACCACATGAAGCAGCAGGACTTCTTCAAGTCCGCCATCCC  
GAAGGCTACGTCCAGGAGCGCACCATCTTCTTCAAGGACGACGGCAACTACAAGACCCGCGCCGAGGTGAAGTTCGAGGGCGACACCC  
TGGTGAACCGCATCGAGCTGAAGGGCATCGACTTAAAGGAGGACGGCAACATCCTGGGGCACAAGCTGGAGTACAACACTACAACAGCCAC  
GACTTCAAGGAGGACGGCAACATCTGGGGCACAAGCTGGAGTACAACACTACAACAGCCGACACAACATCGAGGACGGCGGCGTGCAGCTC  
GCCGACCACTACCAGCAGAACACCCCCATCGGGCAGCGCCCCGTGCTGCTGCCCCGACAACCACTACCTGAGCTACCAGTCCAAGCTGAG  
CAAGACCCCAACGAGAAGCGCGATCACATGGTCCTGCTGGAGTTCGTGACCGCCGCGGGATCACTCTCGGCATGGACGAGCTGTACAA

Fig. S7: Nucleotide sequences of the cloned Fra a 3, ECFP and Venus

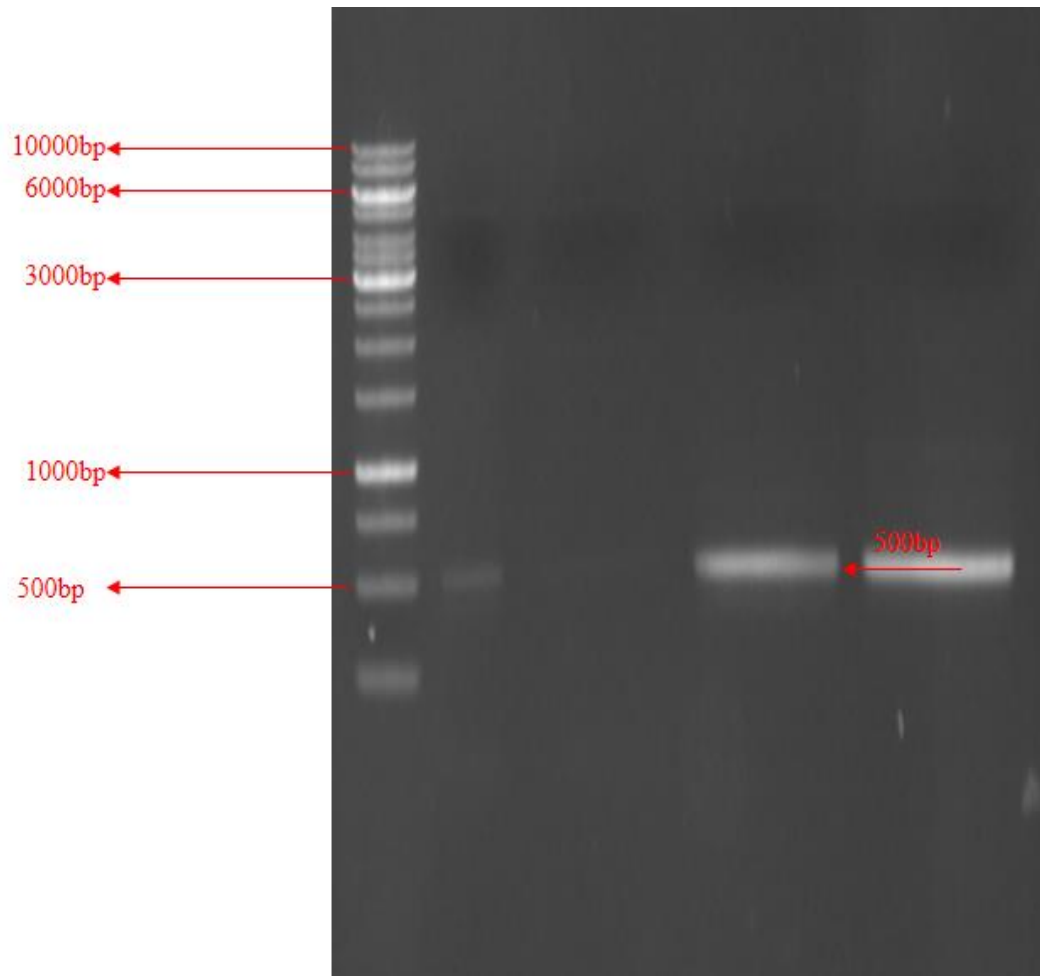

Fig. S8. PCR amplified Fraa 3 gene of band size 500bp

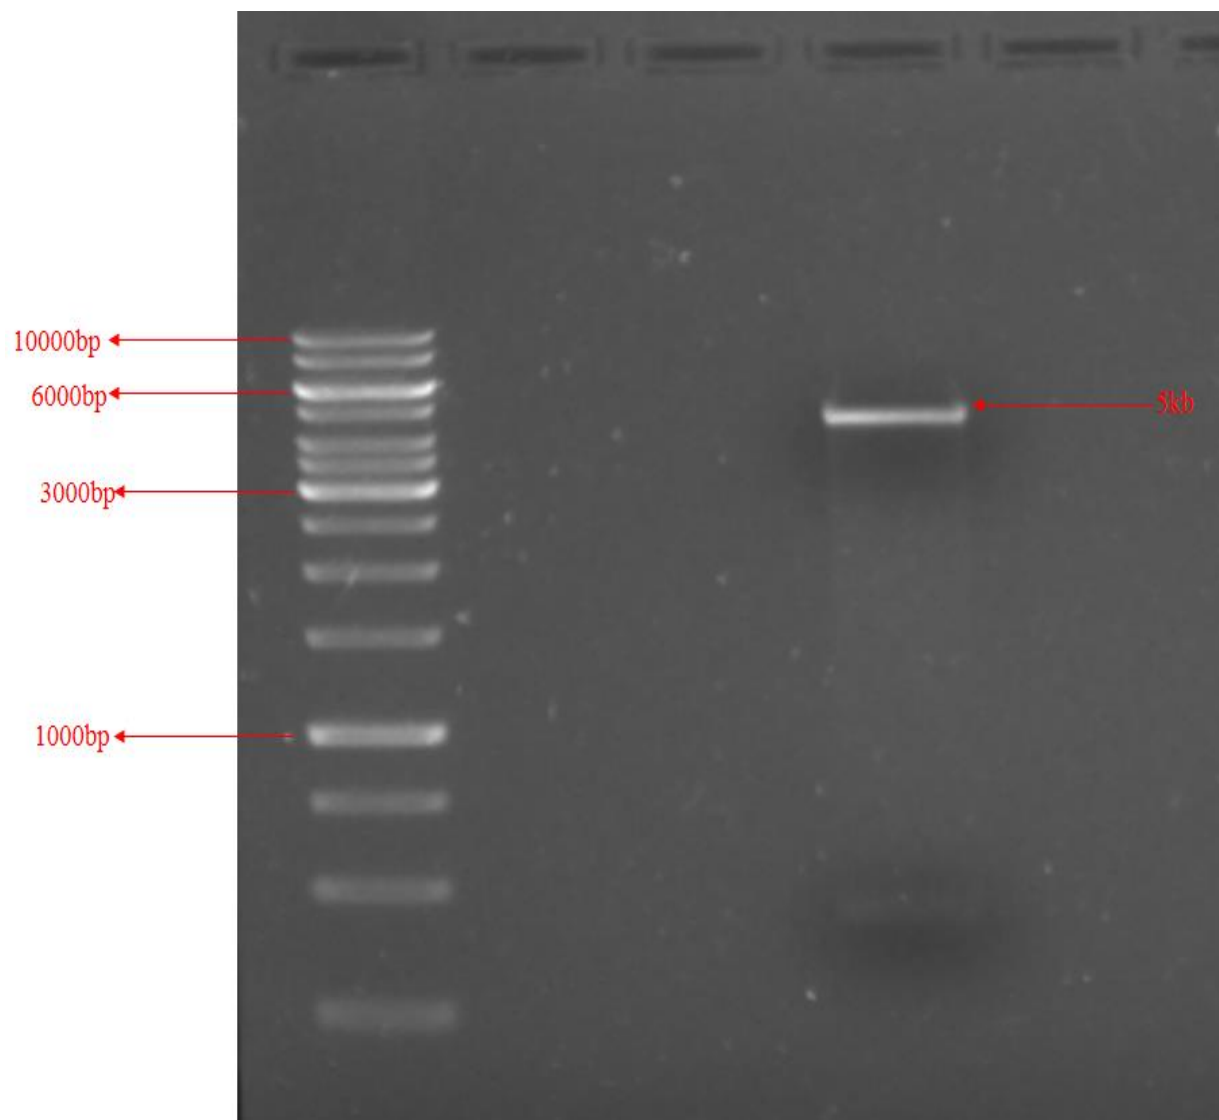

Fig. S9. Recombinant construct of pGEMT-Easy\_ECFP\_Fra a 3\_Venus

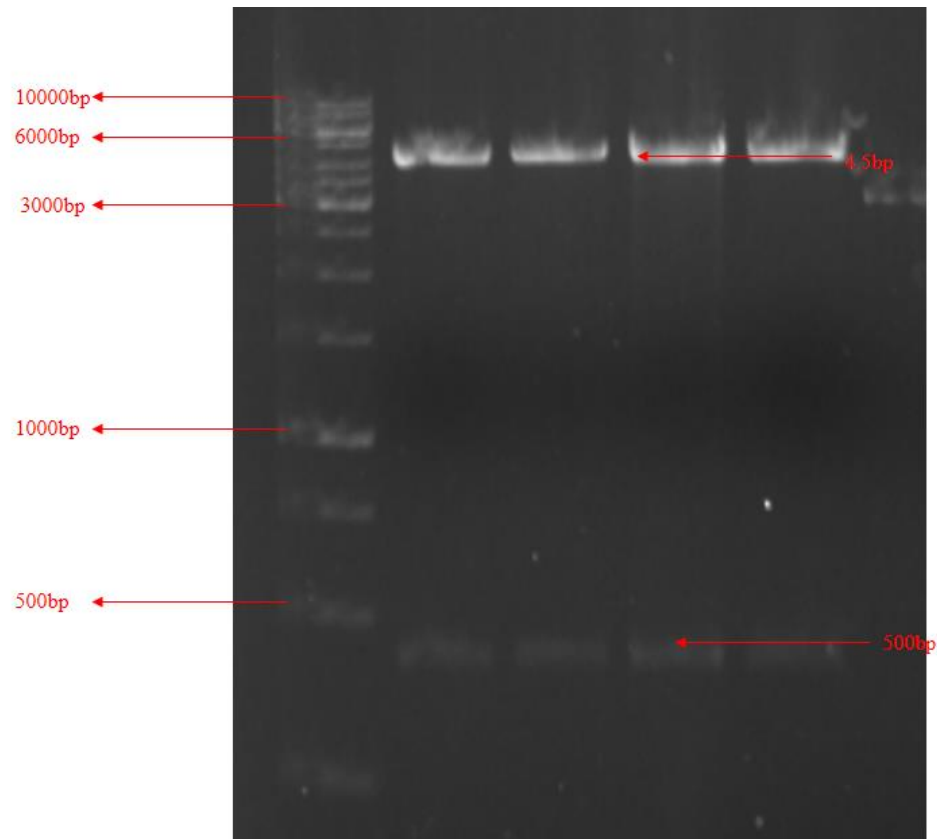

Fig. S10. Restriction digestion of pRSET-B\_ECFP\_Fra a 3\_Venus with *Age* I and *Bst*E II yielding two band size of 4.5 kb and 0.5 kb

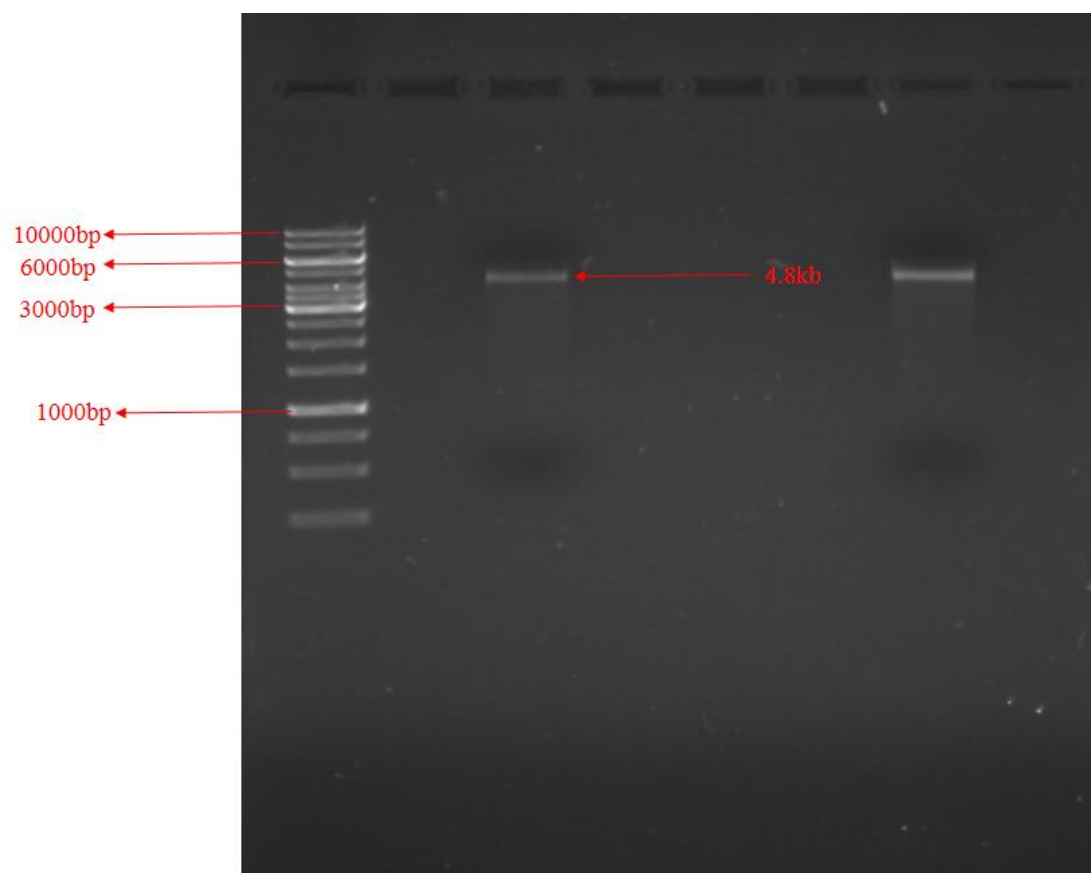

Fig. S11. Recombinant construct of pRSET-B\_ECFP\_Fra a 3\_Venus of band size 4.8 kb

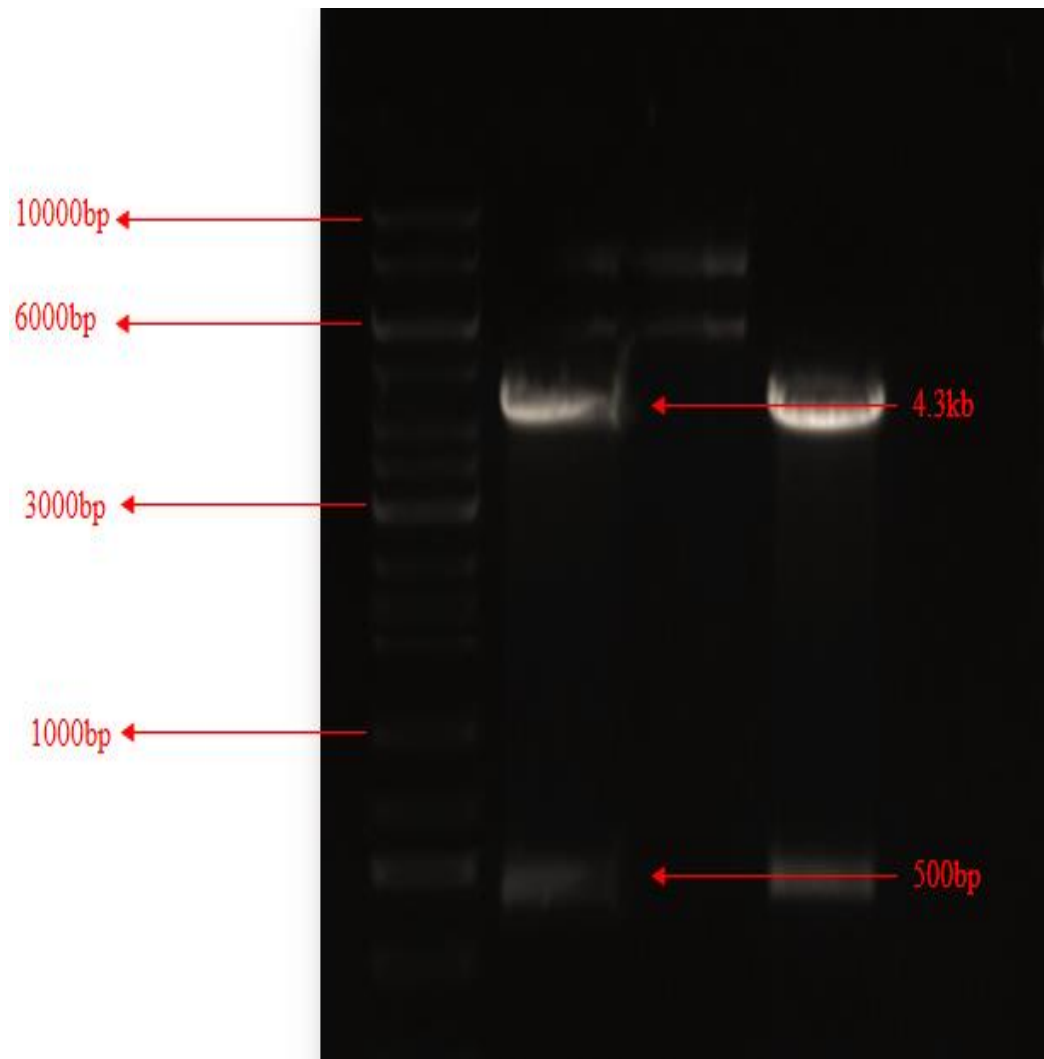

Fig. S12. Restriction digestion of pRSET-B\_ECFP\_Fra a 3\_Venus with *Age* I and *Bst*E II yielding two band size of 4.3 kb and 0.5 kb



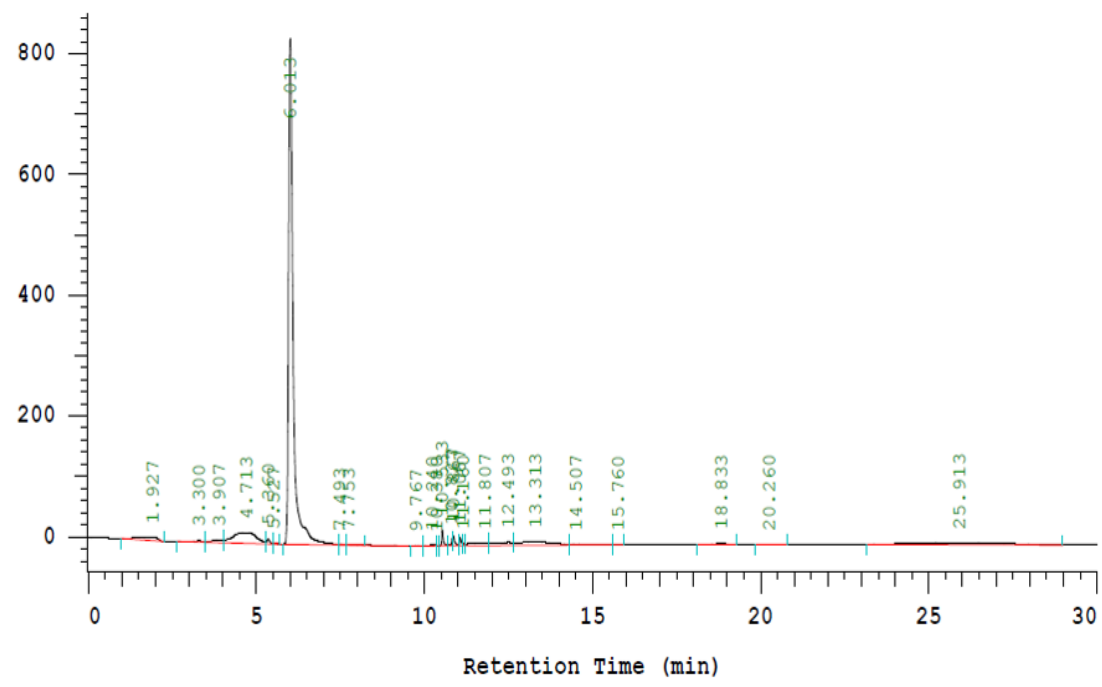

Fig. S13. HPLC Chromatoram of standard catechin showing RT at 6.013 min

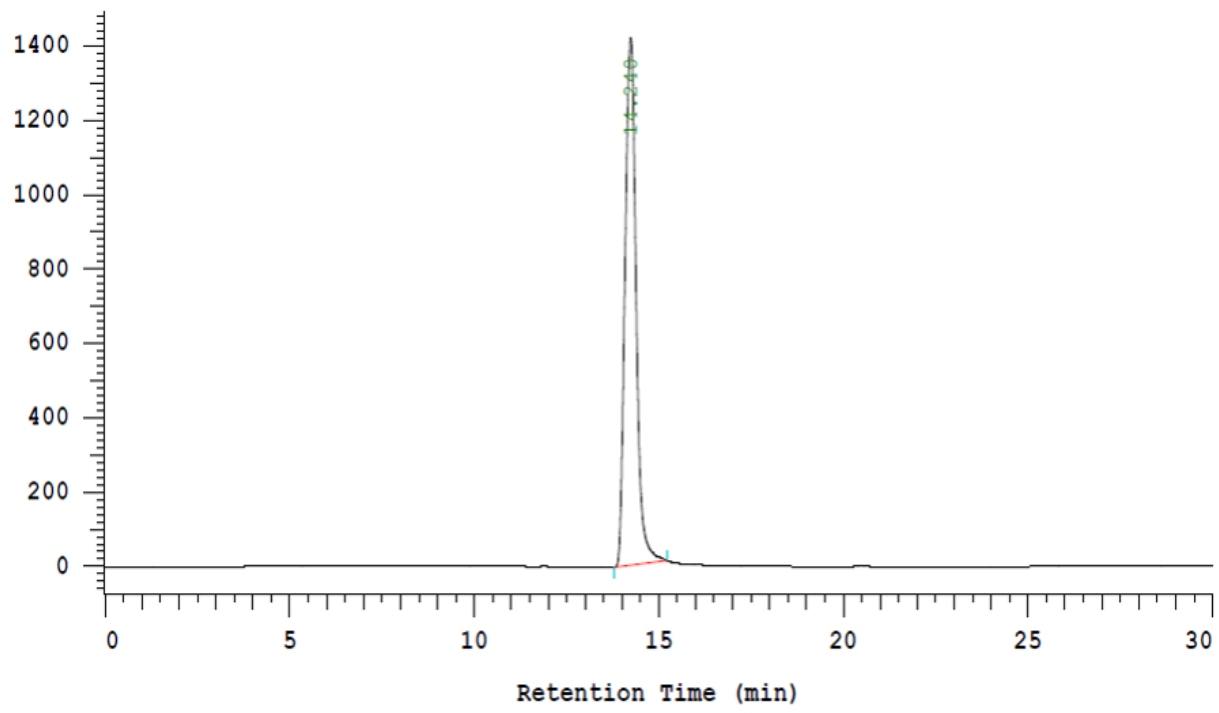

Fig. S14. HPLC Chromatoram of standard naringenin showing RT at 14 min

**Table S1.** Primers for amplification of Fraa3, ECFP and Venus genes. Bold sequences show the restriction sites

|                                                                                      |
|--------------------------------------------------------------------------------------|
| <b>Fraa 3 primers</b>                                                                |
| <b>F.P. with <i>Bst</i>EI restriction sites: 5'- GGGTTACCCCTTCACATACGAATCCG-3'</b>   |
| <b>R.P. with <i>Age</i>I restriction sites: 5'- ACCGGTGTGTATTCCCTCAGGATGG-3'</b>     |
|                                                                                      |
| <b>ECFP Primers</b>                                                                  |
| <b>F.P. with <i>Bam</i>HI restriction sites: 5'- GGATCCATGGTGAGCAAG-3'</b>           |
| <b>R.P. with <i>Bst</i>EI restriction sites: 5'- GGGTTACCCCTTGTACAG CTCGT-3'</b>     |
|                                                                                      |
| <b>Venus primer</b>                                                                  |
| <b>F.P. with <i>Age</i>I restriction sites: 5'- ACCGGTATGGTGAGCAAG-3'</b>            |
| <b>R.P. with <i>Hind</i>III restriction sites: 5'- AAGCTTTTGTACAGCTCGTCCATGCC-3'</b> |

**Table S2.** Primers for amplification for various genes

|                               |                                                         |
|-------------------------------|---------------------------------------------------------|
| <i>NdeI</i> -PT7-rbs-PALF1-F  | 5'- CAT ATG TAATACG AAGG ATG GCC CCC TCC GTC GAC T -3'  |
| <i>AscI</i> -PALF1-R          | 5'- GGC GCG CCG CTC GGA AGT GTA GGC G -3'               |
| <i>AscI</i> -PT7-rbs-PALF2-F  | 5' - GGC GCG CCT TAATACG AAGG CGG TCA CCT TGC CAA -3'   |
| <i>MscI</i> -PALF2-R          | 5'- TGG CCA TGC CAT CAT CTT GAC GAG -3'                 |
| <i>MscI</i> -PT7-rbs-4CL-F    | 5'- TGG CCA TAATACG AAGG TTC CGC AGC GAG TAC -3         |
| <i>Bam</i> HI-4CL-R           | 5'- GGA TCC CTG AGC TGT CGG CGG AGG AT -3'              |
| <i>Bam</i> HI-PT7-rbs-CHS-F   | 5'- GGA TCC TAATACG AAGG ACA TTT TTC TGG CAA AAA A -3'  |
| <i>SacI</i> -CHS-R            | 5'- GAG CTC AGT GCA CAA ACT GTG GAG C -3'               |
| <i>SacI</i> -PT7-rbs-CHI-F    | 5'- GAG CTC TAATACG AAGG ATG TCT CCC TCA CAG T -3'      |
| <i>Hind</i> III-CHI-R         | 5'- AAG CTT TTC AGC AGC AGC AGC TGT C -3'               |
| <i>NdeI</i> -PT7-rbs-F3H-F    | 5'- CAT ATG TAATACG AAGG ATG GCG CCA ACA ACA AC -3'     |
| <i>SacI</i> -F3H-R            | 5'- GAG CTC AGC AAA AAT CTC ATC AGT GC -3'              |
| <i>SacI</i> -PT7-rbs-DFR-F    | 5'- GAG CTC TAATACG AAGG ATC ATG AAA GAC TCT GTT GC -3' |
| <i>Hind</i> III-DFR-R         | 5'- AAG CTT AAC CTT GTT GCC ATT GAC A -3'               |
| <i>Hind</i> III-PT7-rbs-LCR-F | 5'- AAG CTT TAATACG AAGG ATG ACT GTG TTG GAA TCT G -3'  |
| <i>NotI</i> -LCR-R            | 5'- GCG GCC GCA GCA CAC ATT GTG ATG G -3'               |

Yellow colour indicates restriction endonuclease enzyme sequences; green colour indicates PT7 sequences; yellow colour indicates rbs sequences
